# Supplementary material for: Characteristics of Chimeric West Nile Virus Based on the Japanese Encephalitis Virus SA14-14-2 Backbone
Source: MDPI journal article supplement (doi:10.3390/v13071262), 2021-06-29
Supplement: s1 [file s1]

## Supplementary Materials:

### 1. K, L, M, KL and KLM Amplification

Fragment K, L and M were amplified by primers in Table 1 according to PCR reaction system. And the JEV SA14-14-2 cDNA were used as templates for fragment K (Table S1) and M (Table S3) amplification. WNV prME DNA were used as templates for fragment L (Table S2) amplification.

**Table S1.** Fragment K PCR reaction system.

| Component                      | Amount, $\mu$ L |
|--------------------------------|-----------------|
| ddH <sub>2</sub> O             | 30              |
| 5×Phusion HP Reaction Buffer   | 10              |
| Trans 2.5 mM dNTPs             | 4               |
| Primer-F (K-F, 10 $\mu$ M)     | 2.5             |
| Primer-R (K-R, 10 $\mu$ M)     | 2.5             |
| Templates (JEV SA14-14-2 cDNA) | 0.5             |
| NEB Phusion HF DNA Polymerase  | 0.5             |
| Total volume                   | 50 $\mu$ L      |

Cycling conditions: 98 °C 30 s; (98 °C 7 s, 57 °C 30 s, 72 °C 30 s; 35 cycles); 72 °C 10 min, 4 °C  $\infty$ .

**Table S2.** Fragment L PCR reaction system.

| Component                     | Amount, $\mu$ L |
|-------------------------------|-----------------|
| ddH <sub>2</sub> O            | 30              |
| 5×Phusion HP Reaction Buffer  | 10              |
| Trans 2.5 mM dNTPs            | 4               |
| Primer-F (L-F, 10 $\mu$ M)    | 2.5             |
| Primer-R (L-R, 10 $\mu$ M)    | 2.5             |
| Templates (WNV prME)          | 0.5             |
| NEB Phusion HF DNA Polymerase | 0.5             |
| Total volume                  | 50 $\mu$ L      |

Cycling conditions: 98 °C 30 s; (98 °C 7 s, 55 °C 30 s, 72 °C 1 min; 5 cycles); (98 °C 7 s, 60 °C 30 s, 72 °C 1 min; 30 cycles); 72 °C 10 min, 4 °C  $\infty$ .

**Table S3.** Fragment M PCR reaction system.

| Component                      | Amount, $\mu$ L |
|--------------------------------|-----------------|
| ddH <sub>2</sub> O             | 30              |
| 5×Phusion HP Reaction Buffer   | 10              |
| Trans 2.5 mM dNTPs             | 4               |
| Primer-F (M-F, 10 $\mu$ M)     | 2.5             |
| Primer-R (M-R, 10 $\mu$ M)     | 2.5             |
| Templates (JEV SA14-14-2 cDNA) | 0.5             |
| NEB Phusion HF DNA Polymerase  | 0.5             |
| Total volume                   | 50 $\mu$ L      |

Cycling conditions: 98 °C 30 s; (98 °C 7 s, 55 °C 30 s, 72 °C 30 s; 5 cycles); (98 °C 7 s, 60 °C 30 s, 72 °C 30 s; 30 cycles); 72 °C 10 min, 4 °C  $\infty$ .

The amplified DNA (K, L and M) were evaluated by 1% agarose gel electrophoresis and subsequent ethidium bromide staining, and purified by Gel Extraction Kit (Omega Bio-tek, Inc., Norcross, GA, USA). Followed, the fragment KL (Table S4) and KLM (Table S5) were amplified by the following overlap PCR reaction system.

**Table S4.** Fragment KL PCR reaction system.

| Component                         | Amount, $\mu\text{L}$ |
|-----------------------------------|-----------------------|
| ddH <sub>2</sub> O                | 29.3                  |
| 5×Phusion HP Reaction Buffer      | 10                    |
| Trans 2.5 mM dNTPs                | 4                     |
| Primer-F (K-F, 10 $\mu\text{M}$ ) | 2.5                   |
| Primer-R (L-R, 10 $\mu\text{M}$ ) | 2.5                   |
| Templates (Fragment K)            | 0.2                   |
| Templates (Fragment L)            | 1                     |
| NEB Phusion HF DNA Polymerase     | 0.5                   |
| Total volume                      | 50 $\mu\text{L}$      |

Cycling conditions: 98 °C 30 s; (98 °C 7 s, 55 °C 30 s, 72 °C 1 min 15 s; 5 cycles); (98 °C 7 s, 57 °C 30 s, 72 °C 1 min 15 s; 30 cycles); 72 °C 10 min, 4 °C  $\infty$ .

Keeping the equal moles of K and L will help KL production. That is  $n(\text{K}):n(\text{L}) = 1:1$ .

**Table S5.** Fragment KLM PCR reaction system.

| Component                         | Amount, $\mu\text{L}$ |
|-----------------------------------|-----------------------|
| ddH <sub>2</sub> O                | 29.3                  |
| 5×Phusion HP Reaction Buffer      | 10                    |
| Trans 2.5 mM dNTPs                | 4                     |
| Primer-F (K-F, 10 $\mu\text{M}$ ) | 2.5                   |
| Primer-R (M-R, 10 $\mu\text{M}$ ) | 2.5                   |
| Templates (Fragment KL)           | 1                     |
| Templates (Fragment M)            | 0.2                   |
| NEB Phusion HF DNA Polymerase     | 0.5                   |
| Total volume                      | 50 $\mu\text{L}$      |

Cycling conditions: 98 °C 30 s; (98 °C 7 s, 60 °C 30 s, 72 °C 1 min 45 s; 35 cycles); 72 °C 10 min, 4 °C  $\infty$ .

Keeping the equal moles of KL and M will help KLM production. That is  $n(\text{KL}):n(\text{M}) = 1:1$ .

The fragment KLM amplified were evaluated by 1% agarose gel electrophoresis and subsequent ethidium bromide staining, and purified by Gel Extraction Kit (Omega Bio-tek, Inc., Norcross, GA, USA).

## 2. Construction of pACYC177-Linker

Linker with multiple cloning sites (*Bam*H I *Not* I *Bsr*G I *Kpn*2 I *Bsi*W I *Xba* I *Psi* I) (Table S6a) was introduced into the pACYC177 at *Bam*H I (3320 bp) and *Psi* I (3483 bp) restriction sites for pACYC177-linker construction. Two primers Linker- F'/R' was synthesized by Comate Bioscience Co., Ltd. (Changchun, Jilin, China) (Table S6c). The equal moles of two primers were mixed and incubated at 95 °C for 5 min, and the temperature of the mixture was lowered gradually to 65 °C lasting for 10 min, and then the sample temperature was decreased to room temperature [27]. The mixture of Linker-F'/R' could form a double-stranded fragment with a sticky (*Bam*H I) and a blunt (*Psi* I) ends (Table 6b) by the procedure. The fragment was used directly to ligate with digested pACYC177 (Table S7) to construct pACYC177-linker (Table S8).

Do select sequences in Table S6c to synthesize primers! Linker-R' in Table S6b is easily to be as 5'-3' direction to be synthesized, which will result in the SAME DIRECTION primers and lead to the failure of experiment!

**Table S6.** Linker sequences.

| Linker names |           | Linker sequences with multiple cloning sites<br><i>Bam</i> H I- <i>Not</i> I- <i>Bsr</i> G I- <i>Kpn</i> 2 I- <i>Bsi</i> W I- <i>Xba</i> I- <i>Psi</i> I |                                                                                   |
|--------------|-----------|----------------------------------------------------------------------------------------------------------------------------------------------------------|-----------------------------------------------------------------------------------|
| a            | Linker-F  | 5'                                                                                                                                                       | <u>GGATCC</u> ATCGCGGCCGCATCTGTACAATCTCCGGAATCCGTACGATCTCTAGACAC <u>TTATAA</u> 3' |
|              | Linker-R  | 3'                                                                                                                                                       | <u>CCTAGG</u> TAGCGCGGCCGTAGACATGTTAGAGGCCTTAGGCATGCTAGAGATCTGTG <u>AATATT</u> 5' |
| b            | Linker-F' | 5'                                                                                                                                                       | <u>GATCC</u> ATCGCGGCCGCATCTGTACAATCTCCGGAATCCGTACGATCTCTAGACAC <u>TTA</u> 3'     |
|              | Linker-R' | 3'                                                                                                                                                       | <u>G</u> TAGCGCGGCCGTAGACATGTTAGAGGCCTTAGGCATGCTAGAGATCTGTG <u>AAT</u> 5'         |
| c            | Linker-F' | 5'                                                                                                                                                       | GATCCATCGCGGCCGCATCTGTACAATCTCCGGAATCCGTACGATCTCTAGACACTTA 3'                     |
|              | Linker-R' | 5'                                                                                                                                                       | TAAGTGTCTAGAGATCGTACGGATTCCGGAGATTGTACAGATGCGGCCGCGATG 3'                         |

Restriction endonuclease sites GGATCC (*Bam*H I), GCGGCCGC (*Not* I), TGTACA (*Bsr*G I), TCCGGA (*Kpn*2 I), CGTACG (*Bsi*W I), TCTAGA (*Xba* I), and TTATAA (*Psi* I) are underlined. a, linker sequence with uncut restriction sites; b, linker sequence with sticky (*Bam*H I) and blunt (*Psi* I) ends; c, 5'-3' direction of Linker-F'/R'. F indicates forward primer, and R indicates reverse primer.

**Table S7.** Protocol for pACYC177 digestion.

| Component                  | Amount, $\mu$ L |
|----------------------------|-----------------|
| ddH <sub>2</sub> O         | Variable        |
| 10×FastDigest Green Buffer | 5               |
| pACYC177                   | 2.5 $\mu$ g     |
| FastDigest <i>Bam</i> H I  | 2.5             |
| FastDigest <i>Psi</i> I    | 2.5             |
| Total volume               | 50 $\mu$ L      |

The mixtures were incubated at 37 °C for 1 h.

The digested pACYC177 plasmids were evaluated by 1% agarose gel electrophoresis and subsequent ethidium bromide staining, and purified by Gel Extraction Kit (Omega Bio-tek, Inc., Norcross, GA, USA) for ligation (Table S8).

**Table S8.** Ligation protocol.

| Component                      | Amount, $\mu$ L |
|--------------------------------|-----------------|
| T4 DNA Ligase Buffer (10×)     | 1               |
| Vector DNA (digested pACYC177) | 20 ng           |
| Inserted DNA (Linker)          | Variable        |
| T4 DNA Ligase                  | 1               |
| ddH <sub>2</sub> O             | Variable        |
| Total volume                   | 10 $\mu$ L      |

*n* (Vector DNA): *n* (Inserted DNA) =1:3~10.

The ligation product was incubated at 25 °C for 1 h.

5  $\mu$ L of ligation product was transformed into *E. coli* DH5 $\alpha$  competent cells (Takara, Dalian, Liaoning, China), recovering cells, plating and culturing at 37 °C for pACYC177-linker production.

### 3. Construction of pACYC177-KLM

The purified KLM and pACYC177-linker were digested by *Not* I and *Kpn*2 I respectively (Table S9, S10). The digested products were purified by AxyPrep PCR Clean-up Kit (Corning, Glendale, Arizona, USA). The purified digested KLM was ligated onto pACYC177-linker by T4 DNA Ligase (New England Biolabs, Ipswich, MA, USA) (Table S11).

**Table S9.** Protocol for Fragment KLM digestion.

| Component                  | Amount, $\mu$ L |
|----------------------------|-----------------|
| ddH <sub>2</sub> O         | Variable        |
| 10×FastDigest Green Buffer | 5               |
| PCR product (KLM)          | 2.5 $\mu$ g     |
| FastDigest <i>Not</i> I    | 2.5             |
| FastDigest <i>Kpn</i> 2 I  | 2.5             |
| Total volume               | 50 $\mu$ L      |

**Table S10.** Protocol for pACYC177-linker digestion.

| Component                  | Amount, $\mu$ L |
|----------------------------|-----------------|
| ddH <sub>2</sub> O         | Variable        |
| 10×FastDigest Green Buffer | 5               |
| pACYC177-linker            | 2.5 $\mu$ g     |
| FastDigest <i>Not</i> I    | 2.5             |
| FastDigest <i>Kpn</i> 2 I  | 2.5             |
| Total volume               | 50 $\mu$ L      |

The mixtures were incubated at 37 °C for 1 h.

The restriction digested fragments (KLM and pACYC177-linker) were purified by AxyPrep PCR Clean-up Kit (Corning, Glendale, Arizona, USA) for ligation (Table S11).

**Table S11.** Ligation protocol.

| Component                             | Amount, $\mu$ L |
|---------------------------------------|-----------------|
| T4 DNA Ligase Buffer (10×)            | 1               |
| Vector DNA (digested pACYC177-linker) | 20 ng           |
| Inserted DNA (digested KLM)           | Variable        |
| T4 DNA Ligase                         | 1               |
| ddH <sub>2</sub> O                    | Variable        |
| Total volume                          | 10 $\mu$ L      |

*n* (Vector DNA): *n* (Inserted DNA) = 1:3~10.

The ligation product was incubated at 25 °C for 1 h.

5  $\mu$ L of ligation product was transformed into *E. coli* HB101 competent cells (Takara, Dalian, Liaoning, China), recovering cells, plating and culturing at 37 °C for pACYC177-KLM production.

### 4. Construction of pACYC177-KLM-F345-HDVr-T7ter (pChiVax-WN01)

The pACYC177-KLM (Table S12) and the pFLJEV (Table S13) were digested by *Kpn*2 I and *Psi* I respectively. The digested products were purified by AxyPrep PCR Clean-up Kit (Corning, Glendale, Arizona, USA) or evaluated by 1% agarose gel electrophoresis and subsequent ethidium bromide staining, and purified by Gel Extraction Kit. The purified F345-HDVr-T7ter was ligated onto pACYC177-KLM to construct full-length infectious clone pACYC177-KLM-F345-HDVr-T7ter (pChiVax-WN01) (Table S14).

**Table S12.** Protocol for pACYC177-KLM digestion.

| Component                  | Amount, $\mu$ L |
|----------------------------|-----------------|
| ddH <sub>2</sub> O         | Variable        |
| 10×FastDigest Green Buffer | 5               |
| pACYC177-KLM               | 2.5 $\mu$ g     |
| FastDigest <i>Kpn</i> 2 I  | 2.5             |
| FastDigest <i>Psi</i> I    | 2.5             |
| Total volume               | 50 $\mu$ L      |

The mixture was incubated at 25 °C for 1 h.

**Table S13.** Protocol for pFLJEV digestion.

| Component                  | Amount, $\mu$ L |
|----------------------------|-----------------|
| ddH <sub>2</sub> O         | Variable        |
| 10×FastDigest Green Buffer | 5               |
| pFLJEV                     | 2.5 $\mu$ g     |
| FastDigest <i>Kpn</i> 2 I  | 2.5             |
| FastDigest <i>Psi</i> I    | 2.5             |
| Total volume               | 50 $\mu$ L      |

The mixture was incubated at 25 °C for 1 h.

The restriction digested fragments pACYC177-KLM and F345-HDVr-T7ter purified were used for ligation (Table S14).

**Table S14.** Ligation protocol.

| Component                               | Amount, $\mu$ L |
|-----------------------------------------|-----------------|
| T4 DNA Ligase Buffer (10×)              | 1               |
| Vector DNA (digested pACYC177-KLM)      | 20 ng           |
| Inserted DNA (digested F345-HDVr-T7ter) | Variable        |
| T4 DNA Ligase                           | 1               |
| ddH <sub>2</sub> O                      | Variable        |
| Total volume                            | 10 $\mu$ L      |

$n$  (Vector DNA):  $n$  (Inserted DNA) =1:3~10.

The mixture was incubated at 25 °C for 1 h.

5  $\mu$ L of ligation product was transformed into *E. coli* HB101 competent cells (Takara, Dalian, Liaoning, China), recovering cells, plating and culturing at room temperature for pACYC177-KLM-F345-HDVr-T7ter (pChiVax-WN01) production.

**Table S15.** Neuroinvasiveness of ChiVax-WN01 and JEV SA14-14-2 in Mice. Groups (n = 8~10) of 4-week-old female BALB/c mice were inoculated i.p. with  $10^5$  PFU~ $10^1$  PFU of ChiVax-WN01 and JEV SA14-14-2 respectively. The mice were monitored for 15 days.

| <b>Virus (Strain)</b> | <b>Dose (PFU)</b> | <b>Survival (no. Survived/Total)</b> |
|-----------------------|-------------------|--------------------------------------|
| JEV SA14-14-2         | $10^5$            | 10/10                                |
|                       | $10^5$            | 10/10                                |
|                       | $10^4$            | 8/8                                  |
| ChiVax-WN01           | $10^3$            | 10/10                                |
|                       | $10^2$            | 10/10                                |
|                       | $10^1$            | 10/10                                |
| PBS                   | 100 $\mu$ L       | 10/10                                |

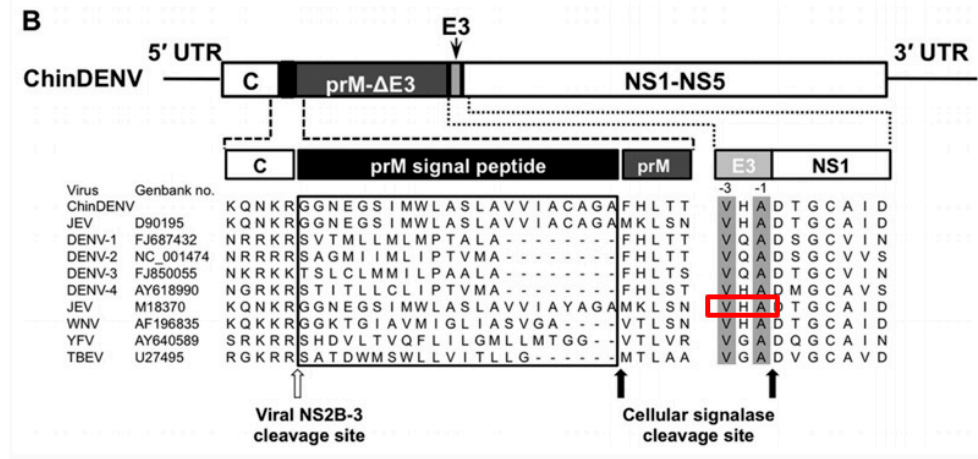

**Figure S1.** Alignment of flavivirus amino acid sequences around the C-prM and E-NS1 junctions [21]. The last three amino acids "VHA" in the JEV E protein were listed in the red rectangle.

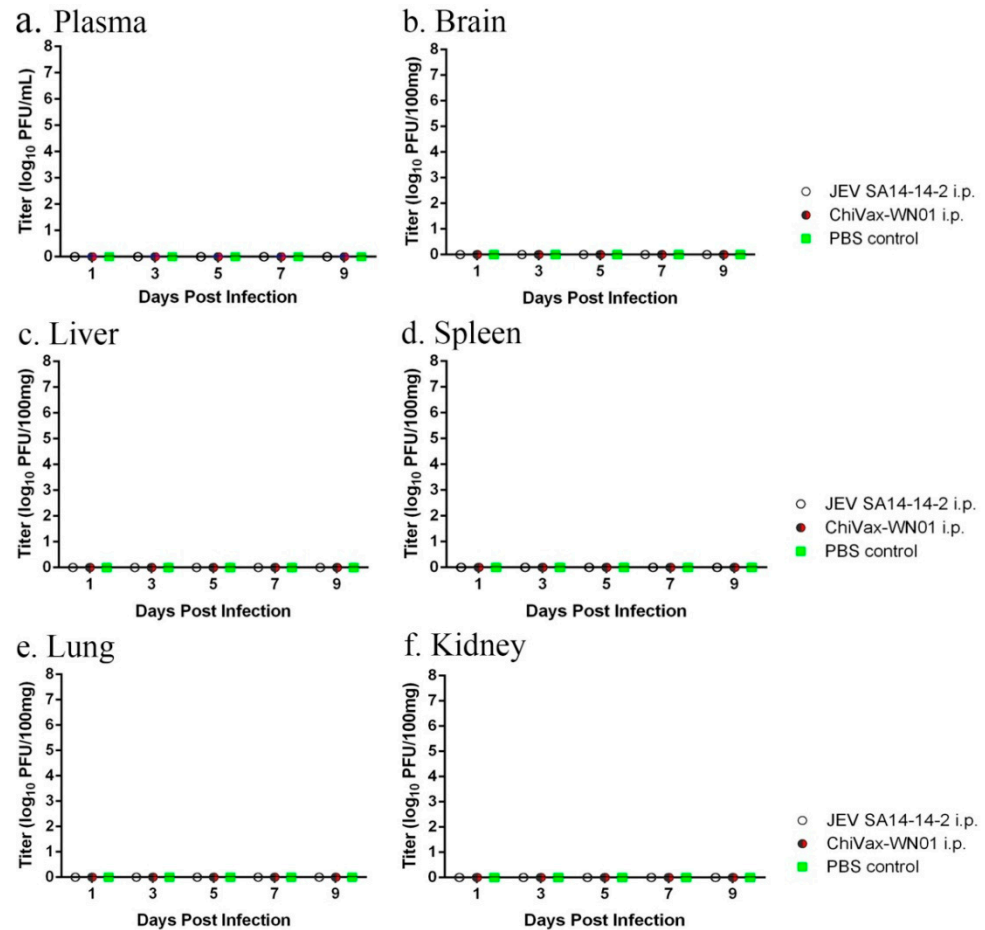

**Figure S2.** Organ titers following i.p. inoculation. 4-week-old female BALB/c mice were inoculated i.p. with 100 PFU of JEV SA14-14-2 or ChiVax-WN01, respectively. Three mice in each group were euthanized on day 1, 3, 5, 7 and 9, and plasma and organs (brain, liver, spleen, lung and kidney) were collected for titration by plaque assay.
